# Supplementary material
Source: publisher site journal article supplement (https://www.dovepress.com/get_supplementary_file.php?f=216745-S2.xlsx)
Supplement: Supplementary file 1 [file get_supplementary_file.php]

## Sheet: BAC_SNP_pileup.total.cds
Table.S2 SNPs statistics for 10 A. baumannii isolates by whole-genome resequencing
	MDR-CQA	MDR-CQB	MDR-CQC	MDR-CQD	MDR-CQE	MDR-CQF	MDR-CQG	MDR-CQH	MDR-CQI	MDR-CQJ
Start_synonymous	0	0	0	0	1	0	0	0	1	0
Stop_synonymous	1	1	0	1	1	1	0	1	1	0
Start_nonsynonymous	0	0	0	0	0	0	0	0	0	0
Stop_nonsynonymous	1	1	0	1	2	1	0	0	2	0
Premature_stop	6	3	0	3	9	6	0	5	9	0
Synonymous	1140	1248	0	1248	1510	1140	3	999	1508	3
Nonsynonymous	359	317	3	317	438	359	3	292	438	4
Total_CDS_SNP	1507	1570	3	1570	1961	1507	6	1297	1959	7
Intergenic	115	116	0	116	199	115	1	106	199	0
Total_SNP	1622	1686	3	1686	2160	1622	7	1403	2158	7
